# Supplementary material for: Nucleolin mediates the internalization of rabbit hemorrhagic disease virus through clathrin-dependent endocytosis
Source: PLoS Pathog. 2018 Oct 19;14(10):e1007383. doi: 10.1371/journal.ppat.1007383 (PMC6209375; doi:10.1371/journal.ppat.1007383)
Supplement: S2 Table — (XLSX) [file ppat.1007383.s006.XLSX]

## Sheet: Table S2 Primers
Oligonucleotides - Annealing and direct liagation:
Target Vector	Target sequence for PCR and in-fusion ligation	Sequence 5′ - 3′
pGEX-4T-1	NCL-F	TGGATCCCCGGAATTCATGGTGAAGCTCGCGAAGGCA	Plasmids for protein expression in E. coli.
pGEX-4T-1	NCL-R	GATGCGGCCGCTCGAGCTATTCAAACTTCGTCTTCTTTCC	Plasmids for protein expression in E. coli.
pGEX-4T-1	NCL-NTD-F	TGGATCCCCGGAATTCATGGTGAAGCTCGCGAAGGCA	Plasmids for protein expression in E. coli.
pGEX-4T-1	NCL-NTD-R	GATGCGGCCGCTCGAGCTAAGCCGTAGTCGGTTCTGTGCC	Plasmids for protein expression in E. coli.
pGEX-4T-1	NCL-RBD-F	TGGATCCCCGGAATTCATGTTCAATCTCTTTGTTGGAAACC	Plasmids for protein expression in E. coli.
pGEX-4T-1	NCL-RBD-R	GATGCGGCCGCTCGAGCTAAGGTTTGGCCCAGTCCAAGGTAA	Plasmids for protein expression in E. coli.
pGEX-4T-1	NCL-CTD-F	TGGATCCCCGGAATTCATGAAGGGTGAAGGTGGCTTC	Plasmids for protein expression in E. coli.
pGEX-4T-1	NCL-CTD-R	GATGCGGCCGCTCGAGCTATTCAAACTTCGTCTTCTTTCC	Plasmids for protein expression in E. coli.
pGEX-4T-1	NCL-NTD-A-F	TGGATCCCCGGAATTCATGGTGAAGCTCGCGAAGGCA	Plasmids for protein expression in E. coli.
pGEX-4T-1	NCL-NTD-A-R	GATGCGGCCGCTCGAGCTACTTCTTGCCAGGTGTGGTAAC	Plasmids for protein expression in E. coli.
pGEX-4T-1	NCL-NTD-B-F	TGGATCCCCGGAATTCATGGGAGCCACACCAGGCAAAGCA	Plasmids for protein expression in E. coli.
pGEX-4T-1	NCL-NTD-B-R	GATGCGGCCGCTCGAGCTATGGTGTAGTCTCCATAGCTTC	Plasmids for protein expression in E. coli.
pGEX-4T-1	NCL-NTD-C-F	TGGATCCCCGGAATTCATGGCCAAAGGAAAGAAAGCTGCA	Plasmids for protein expression in E. coli.
pGEX-4T-1	NCL-NTD-C-R	GATGCGGCCGCTCGAGCTAAGCCGTAGTCGGTTCTGTGCC	Plasmids for protein expression in E. coli.
pGEX-4T-1	RHDV VP60-F	TGGATCCCCGGAATTCATGGAGGGCAAAACCCGCACA	Plasmids for protein expression in E. coli.
pGEX-4T-1	RHDV VP60-R	GATGCGGCCGCTCGAGCTAGACATAAGAAAAGCCATTGGT	Plasmids for protein expression in E. coli.
pGEX-4T-1	VP60-NTA-F	TGGATCCCCGGAATTCATGGAGGGCAAAACCCGCACA	Plasmids for protein expression in E. coli.
pGEX-4T-1	VP60-NTA-R	GATGCGGCCGCTCGAGCTATTCTTGTTGGTCCACCTG	Plasmids for protein expression in E. coli.
pGEX-4T-1	VP60-S-F	TGGATCCCCGGAATTCATGACATGGAGGACTAACTTTTAC	Plasmids for protein expression in E. coli.
pGEX-4T-1	VP60-S-R	GATGCGGCCGCTCGAGCTAGGAGGGGGCTCTAATCATCACAAA	Plasmids for protein expression in E. coli.
pGEX-4T-1	VP60-P1-F	TGGATCCCCGGAATTCATGAGCAAGACTGTTGACTCAATC	Plasmids for protein expression in E. coli.
pGEX-4T-1	VP60-P1-R	GATGCGGCCGCTCGAGCTACCAGCCATATGTGCTGCCGTT	Plasmids for protein expression in E. coli.
pGEX-4T-1	VP60-P2s-F	TGGATCCCCGGAATTCATGTCAAGCCCTCGGTTTGCCGACATT	Plasmids for protein expression in E. coli.
pGEX-4T-1	VP60-P2s-R	GATGCGGCCGCTCGAGCTAAGGAGTGCCAGGTGTAGTCACAAT	Plasmids for protein expression in E. coli.
pGEX-4T-1	VP60-P1s-F	TGGATCCCCGGAATTCATGGCCGCTGCACCTGTGGGTAAGAAC	Plasmids for protein expression in E. coli.
pGEX-4T-1	VP60-P1s-R	GATGCGGCCGCTCGAGCTAGACATAAGAAAAGCCATTGGT	Plasmids for protein expression in E. coli.
pGEX-4T-1	VP60-P1s-C1-F	TGGATCCCCGGAATTCATGAGGCGCACCGGTGACGTCAAC	Plasmids for protein expression in E. coli.
pGEX-4T-1	VP60-P1s-C1-R	GATGCGGCCGCTCGAGCTAGACATAAGAAAAGCCATTGGT	Plasmids for protein expression in E. coli.
pGEX-4T-1	VP60-P1s-C2-F	TGGATCCCCGGAATTCATGTACGGCACAGGCTCCCAACCA	Plasmids for protein expression in E. coli.
pGEX-4T-1	VP60-P1s-C2-R	GATGCGGCCGCTCGAGCTAGACATAAGAAAAGCCATTGGT	Plasmids for protein expression in E. coli.
pGEX-4T-1	VP60-P1s-C3-F	TGGATCCCCGGAATTCATGAACAACTACTCGTCAGCACTC	Plasmids for protein expression in E. coli.
pGEX-4T-1	VP60-P1s-C3-R	GATGCGGCCGCTCGAGCTAGACATAAGAAAAGCCATTGGT	Plasmids for protein expression in E. coli.
pGEX-4T-1	VP60-P1s-N1-F	TGGATCCCCGGAATTCATGGCCGCTGCACCTGTGGGTAAGAAC	Plasmids for protein expression in E. coli.
pGEX-4T-1	VP60-P1s-N1-R	GATGCGGCCGCTCGAGCTACACGAGTGTGCTCTTGGA	Plasmids for protein expression in E. coli.
pGEX-4T-1	VP60-P1s-N2-F	TGGATCCCCGGAATTCATGGCCGCTGCACCTGTGGGTAAGAAC	Plasmids for protein expression in E. coli.
pGEX-4T-1	VP60-P1s-N2-R	GATGCGGCCGCTCGAGCTAGAGTTCAGTCAAGTCAATGAG	Plasmids for protein expression in E. coli.
pGEX-4T-1	VP60-P1s-N3-F	TGGATCCCCGGAATTCATGGCCGCTGCACCTGTGGGTAAGAAC	Plasmids for protein expression in E. coli.
pGEX-4T-1	VP60-P1s-N3-R	GATGCGGCCGCTCGAGCTAGTACCCGTCCACACTTAAACC	Plasmids for protein expression in E. coli.
pGEX-4T-1	VP60-P1s-N4-F	TGGATCCCCGGAATTCATGGCCGCTGCACCTGTGGGTAAGAAC	Plasmids for protein expression in E. coli.
pGEX-4T-1	VP60-P1s-N4-R	GATGCGGCCGCTCGAGCCCTGACAACAGACGCGAACAT	Plasmids for protein expression in E. coli.
pGEX-4T-1	NCL-NTD-C1-F	TGGATCCCCGGAATTCATGGCCAAAGGAAAGAAAGCTGCA	Plasmids for protein expression in E. coli.
pGEX-4T-1	NCL-NTD-C1-R	GATGCGGCCGCTCGAGCTACTCGTCCTCATCATCCTCTTC	Plasmids for protein expression in E. coli.
pGEX-4T-1	NCL-NTD-C2-F	TGGATCCCCGGAATTCATGGATGACGACGACGACGAA	Plasmids for protein expression in E. coli.
pGEX-4T-1	NCL-NTD-C2-R	GATGCGGCCGCTCGAGCTATTCTTTGACAGGCTCTTCCTC	Plasmids for protein expression in E. coli.
pGEX-4T-1	NCL-NTD-C3-F	TGGATCCCCGGAATTCATGGCACCTGGAAAACGAAAG	Plasmids for protein expression in E. coli.
pGEX-4T-1	NCL-NTD-C3-R	GATGCGGCCGCTCGAGCTAAGCCGTAGTCGGTTCTGTGCC	Plasmids for protein expression in E. coli.
pGEX-4T-1	CLTA-F	TGGATCCCCGGAATTCATGGCTGAGCTAGATCCGTTC	Plasmids for protein expression in E. coli.
pGEX-4T-1	CLTA-R	GATGCGGCCGCTCGAGCTAGTGCACCAGGGGGGCCTGCTT	Plasmids for protein expression in E. coli.
pGEX-4T-1	CLTA-N-F	TGGATCCCCGGAATTCATGGCTGAGCTAGATCCGTTC	Plasmids for protein expression in E. coli.
pGEX-4T-1	CLTA-N-R	GATGCGGCCGCTCGAGCTAATTCATCACTCCATCAACAGC	Plasmids for protein expression in E. coli.
pGEX-4T-1	CLTA(80-120AA)-F	TGGATCCCCGGAATTCATGCGGCGAATACTACCAGGAA	Plasmids for protein expression in E. coli.
pGEX-4T-1	CLTA(80-120AA)-R	GATGCGGCCGCTCGAGCTAGCGTTCTTTTTGCTCTTC	Plasmids for protein expression in E. coli.
pGEX-4T-1	CLTA(120-160AA)-F	TGGATCCCCGGAATTCATGTTGGAAGCCCTGGATGCCAAT	Plasmids for protein expression in E. coli.
pGEX-4T-1	CLTA(120-160AA)-R	GATGCGGCCGCTCGAGCTAGTTCGCTTTTGTTTTCTG	Plasmids for protein expression in E. coli.
pGEX-4T-1	CLTA-C-F	TGGATCCCCGGAATTCATGAACAGGGCAGCAGAAGAAGCC	Plasmids for protein expression in E. coli.
pGEX-4T-1	CLTA-C-R	GATGCGGCCGCTCGAGCTAGTGCACCAGGGGGGCCTGCTT	Plasmids for protein expression in E. coli.
p3×FLAG-CMV-14	NCL-Flag-F	TTGCGGCCGCGAATTCAATGGTGAAGCTCGCGAAGGCA	Plasmids for protein expression in RK13 cells
p3×FLAG-CMV-14	NCL-Flag-R	AGTCAGCCCGGGATCCCTATTCAAACTTCGTCTTCTTTCC	Plasmids for protein expression in RK13 cells
pCMV-Myc	Myc-VP60-F	ATGGAGGCCCGAATTCGGATGGAGGGCAAAACCCGCACA	Plasmids for protein expression in RK13 cells
pCMV-Myc	Myc-VP60-R	GTACCTCGAGAGATCTCTAGACATAAGAAAAGCCATTGGT	Plasmids for protein expression in RK13 cells
pCMV-Myc	Myc-CLTA-F	ATGGAGGCCCGAATTCGGATGGCTGAGCTAGATCCGTTC	Plasmids for protein expression in RK13 cells
pCMV-Myc	Myc-CLTA-R	GTACCTCGAGAGATCTTCAGTGCACCAGGGGGGCCTGCTT	Plasmids for protein expression in RK13 cells
	pGEX-4T-1-F	CTCGAGCGGCCGCATCGTGACTGA	primer for pGEX-4T-1 vector linearization
	pGEX-4T-1-R	GAATTCCGGGGATCCACGCGGAA	primer for pGEX-4T-1 vector linearization
	pCMV-Myc-F	AGATCTCTCGAGGTACCGCG	primer for pCMV-Myc vector linearization
	pCMV-Myc-R	CCGAATTCGGGCCTCCATG	primer for pCMV-Myc vector linearization
	p3×FLAG-CMV-14-F	GGATCCCGGGCTGACTACAAA	primer for p3×FLAG-CMV-14 vector linearization
	p3×FLAG-CMV-14-R	GAATTCGCGGCCGCAAGCTT	primer for p3×FLAG-CMV-14 vector linearization
Oligonucleotides - Mutagensis by QuikChange PCR:
Target vector	QuikChange PCR	Sequence 5′ - 3′	Plasmids for protein expression in E. coli.
pGEX-4T-1* RHDV VP60-P1s-C1 (468-579)	RHDV VP60 468-579 468 RRTG → DDPP F	TCCCCGGAATTCATGGACGATCCACCTGACGTCAACGCCGCA	Plasmids for protein expression in E. coli.
pGEX-4T-1* RHDV VP60-P1s-C1 (468-579)	RHDV VP60 468-579 468 RRTG → DDPP R	AGGTGGATCGTCCATGAATTCCGGGGATCCACG	Plasmids for protein expression in E. coli.
pGEX-4T-1* RHDV VP60-P1s-C1 (468-579)	RHDV VP60 468-579 472 DVN → RSP F	ATGAGGCGCACCGGTCGAAGTCCAGCCGCAGCT	Plasmids for protein expression in E. coli.
pGEX-4T-1* RHDV VP60-P1s-C1 (468-579)	RHDV VP60 468-579 472 DVN → RSP R	TGGACTTCGACCGGTGCGCCTCATGAATTCCGG	Plasmids for protein expression in E. coli.
pGEX-4T-1* RHDV VP60-P1s-C1 (468-579)	RHDV VP60 468-579 475 AAA → FPQ F	ACCGGTGACGTCAACTTCCCACAAGGGTCAACC	Plasmids for protein expression in E. coli.
pGEX-4T-1* RHDV VP60-P1s-C1 (468-579)	RHDV VP60 468-579 475 AAA → FPQ R	TTGTGGGAAGTTGACGTCACCGGTGCGCCTCAT	Plasmids for protein expression in E. coli.
pGEX-4T-1* RHDV VP60-P1s-C1 (468-579)	RHDV VP60 468-579 479 GSTN →KVPA F	GTCAACGCCGCAGCTAAGGTCCCAGCTGGGACCCAG	Plasmids for protein expression in E. coli.
pGEX-4T-1* RHDV VP60-P1s-C1 (468-579)	RHDV VP60 468-579 479 GSTN →KVPA R	AGCTGGGACCTTAGCTGCGGCGTTGACGTCACCGGT	Plasmids for protein expression in E. coli.
pGEX-4T-1* RHDV VP60-P1s-C1 (468-579)	RHDV VP60 468-583 482 GTQ →KPA F	GCTGGGTCAACCAACAAGCCAGCTTACGGCACA	Plasmids for protein expression in E. coli.
pGEX-4T-1* RHDV VP60-P1s-C1 (468-579)	RHDV VP60 468-583 482 GTQ →KPA R	AGCTGGCTTGTTGGTTGACCCAGCTGCGGCGTT	Plasmids for protein expression in E. coli.
pGEX-4T-1* RHDV VP60-P1s-C1 (468-579)	RHDV VP60 468-583 483 GSGSGS F	TCAACCAACGGGACCGGATCCGGCAGCGGCAGCCAGTACGGC	Plasmids for protein expression in E. coli.
pGEX-4T-1* RHDV VP60-P1s-C1 (468-579)	RHDV VP60 468-583 483 GSGSGS R	GCTGCCGCTGCCGGATCCGGTCCCGTTGGTTGACCCAGCTGC	Plasmids for protein expression in E. coli.
Oligonucleotides - Quantitive PCR
Target		Sequence 5′ - 3′
RHDV cDNA	F	TTGTTTGTGATGGCCTCGGGT	Measurement of viral entry
RHDV cDNA	R	GCGAACATGATGGGTGTGTTCTT	Measurement of viral entry
GADPH cDNA	F	AGGGCTGCTTTTAACTCTGGTAAA	Measurement of GADPH
GADPH cDNA	R	CATATTGGAACATGTAAACCATGTAGTTG	Measurement of GADPH
